# Supplementary material for: Advanced Drinking Groundwater As Phytofiltration by the Hyperaccumulating Fern Pteris vittata
Source: MDPI journal article supplement (doi:10.3390/w13162187), 2021-08-10
Supplement: s1 [file s1]

Archive with 1 entries (1 files):
- water-1282760-supplementary.pdf
