# Supplementary material for: Advanced Drinking Groundwater As Phytofiltration by the Hyperaccumulating Fern Pteris vittata
Source: MDPI journal article supplement (doi:10.3390/w13162187), 2021-08-10
Supplement: s1 [file s1 › water-1282760-supplementary.pdf]

## Supplementary Materials:

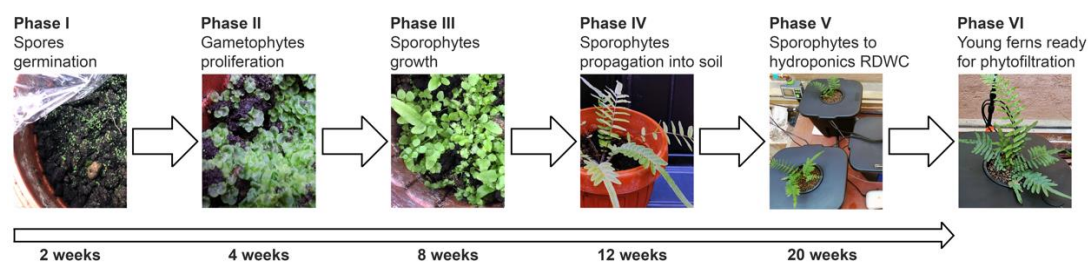

**Figure S1.** Stages of fern development from spore germination to young sporophytes ready for phytofiltration. A timeline describes the weeks needed for each growth phase.

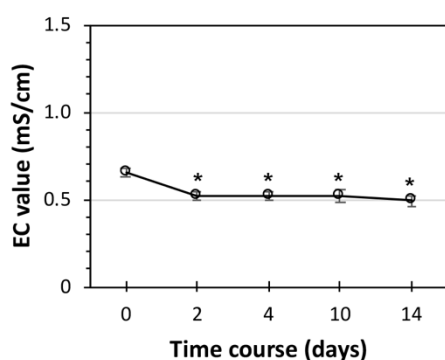

**Figure S2.** Electrical Conductivity (EC) measurement. 12 ferns were grown in 15 -litre of water without adding any nutrients. The EC value was evaluated at different time point (T0, T2, T4, T10, T14). The experiment was performed in triplicate. Statistical differences compared to T0 were evaluated by student's t-test (\*  $p < 0.5$ ).

**Table S1.** Arsenic concentration in water was measured at T0 and after 15 and 30 days, in the absence of ferns, as a preliminary control.

| Time (days) | Arsenic Concentration (ug/L) |
|-------------|------------------------------|
| 0           | 59.705                       |
| 15          | 52.00                        |
| 30          | 47.038                       |
